# Supplementary figures and images for: Ameliorative Effects of Zingiber officinale Rosc on Antibiotic-Associated Diarrhea and Improvement in Intestinal Function
Source: MDPI journal article supplement (doi:10.3390/molecules29030732), 2024-02-05

Standards material

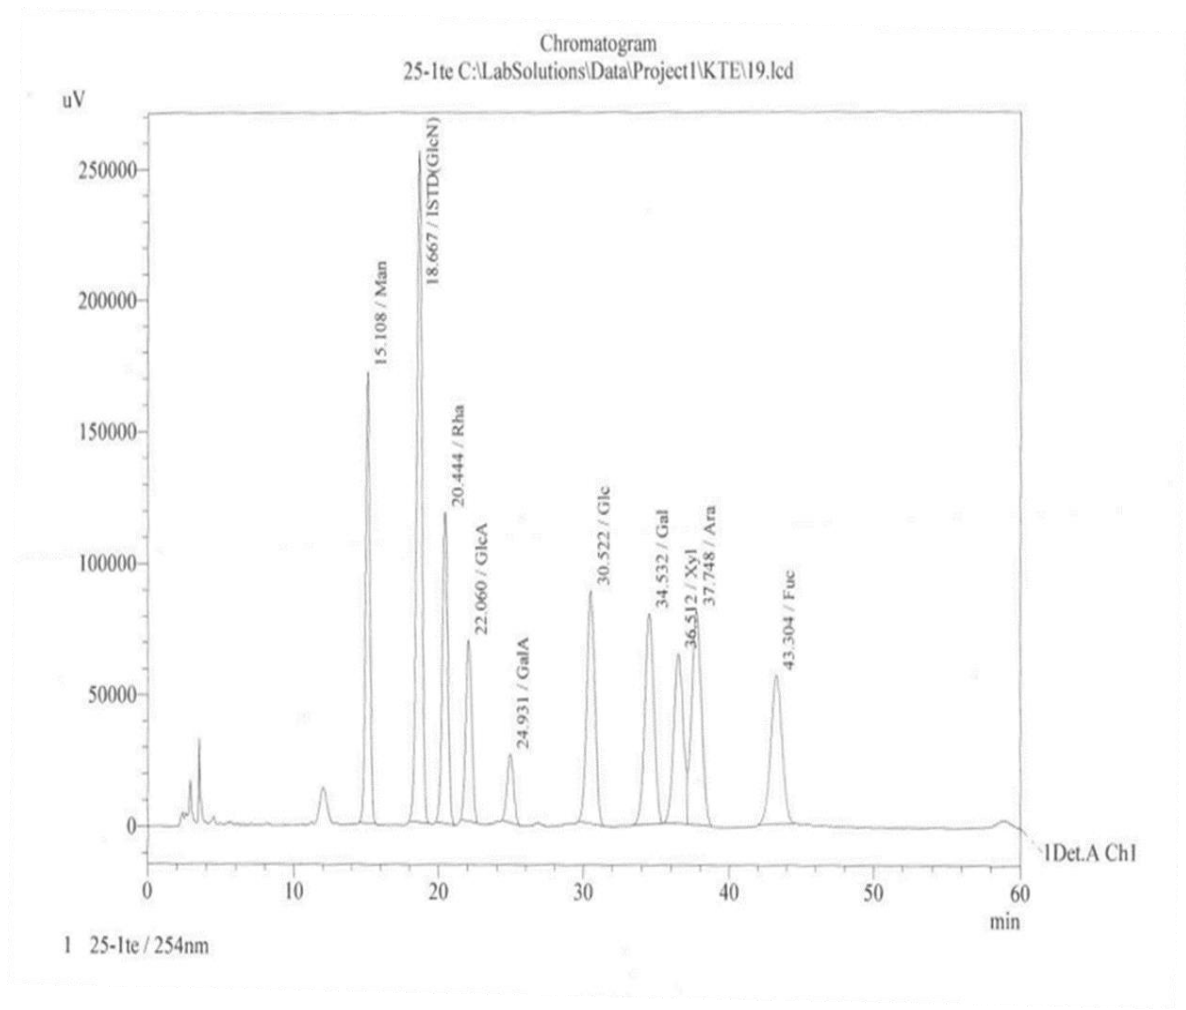

ZO extract

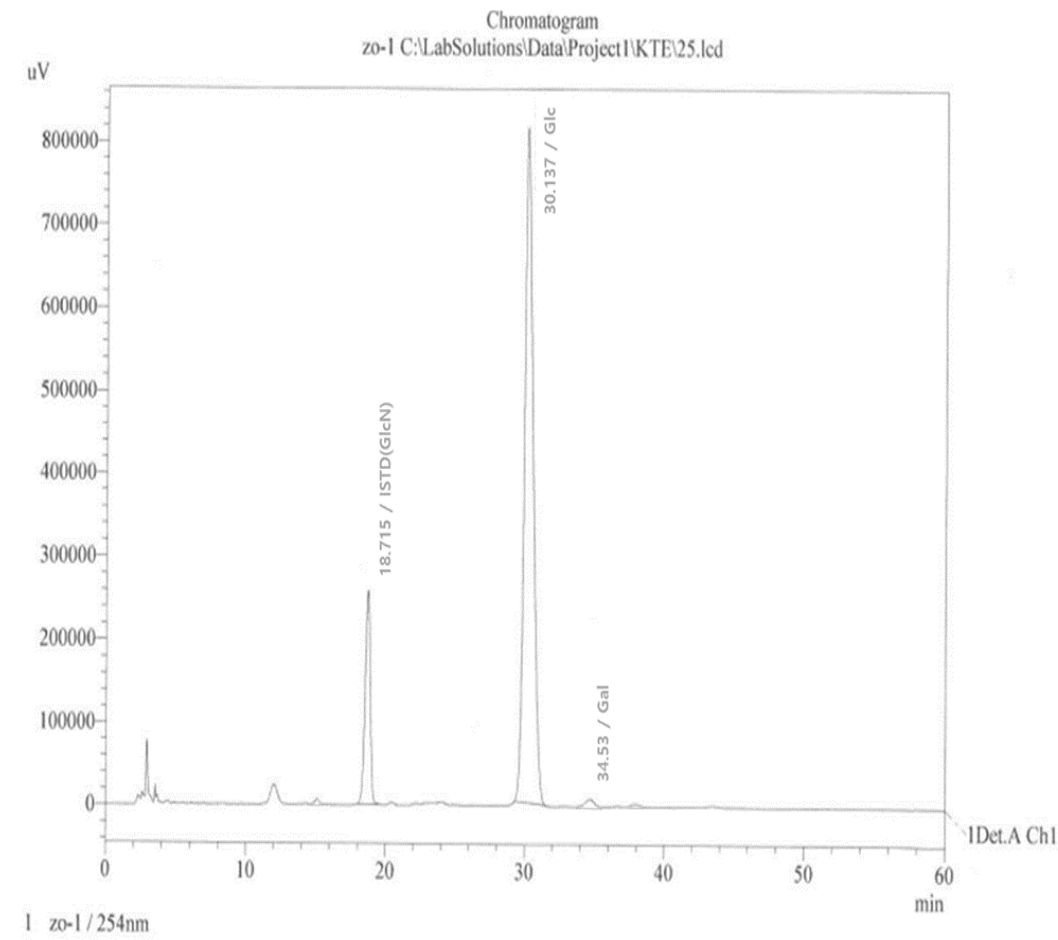

Supplement: s1 [file s1]
